# Women Produce Fewer but Triglyceride-Richer Very Low-Density Lipoproteins than Men

Faidon Magkos, Bruce W. Patterson, B. Selma Mohammed, Samuel Klein, and Bettina Mittendorfer

Center for Human Nutrition (F.M., B.W.P., B.S.M., S.K., B.M.), Washington University School of Medicine, St. Louis, Missouri 63110; and Department of Nutrition and Dietetics (F.M.), Harokopio University, GR-17671 Athens, Greece

**Context:** Very low-density lipoproteins (VLDL) are a major risk factor for cardiovascular disease. The concentrations of VLDL particles and VLDL-triglyceride (TG) in plasma are lower in women than men, but the mechanisms responsible for these differences are unclear.

**Objective:** The objective of the study was to investigate the effects of sex on VLDL-TG and VLDL-apolipoprotein B-100 (apoB-100) metabolism.

**Experimental Design and Main Outcome Measures:** We measured basal VLDL-TG and VLDL-apoB-100 kinetics by using stable isotope labeled tracers.

**Setting/Participants:** Twenty-six healthy, lean subjects (13 men, aged  $29 \pm 5$  yr; 13 women, aged  $28 \pm 6$  yr) were studied in the General Clinical Research Center at Washington University School of Medicine.

**Results:** VLDL-TG and VLDL-apoB-100 concentrations were less in women than men ( $P < 0.05$ ). The secretion rate of VLDL-TG was

approximately 70% greater ( $P < 0.05$ ), whereas the secretion rate of VLDL-apoB-100 (*i.e.* VLDL particles) was approximately 20% less ( $P < 0.05$ ) in women than men. The molar ratio of VLDL-TG and VLDL-apoB-100 secretion rates was therefore more than double ( $P < 0.05$ ) in women than men. VLDL-TG plasma clearance rate was approximately 70% greater in women than men ( $P < 0.05$ ), whereas VLDL-apoB-100 plasma clearance rate was not different between sexes. However, VLDL-TG and VLDL-apoB-100 mean residence times in plasma were both shorter (by 45 and 25%, respectively;  $P < 0.05$ ) in women than men.

**Conclusions:** Increased VLDL-TG plasma clearance is responsible for lower VLDL-TG concentration, whereas decreased VLDL-apoB-100 secretion rate, combined with shorter VLDL-apoB-100 residence time in plasma, is responsible for lower VLDL-apoB-100 concentration in women than men. The greater molar ratio of VLDL-TG and VLDL-apoB-100 secretion rates suggests that the liver in women secretes fewer but TG-richer VLDL particles than the liver in men. (*J Clin Endocrinol Metab* 92: 1311–1318, 2007)

WOMEN OF REPRODUCTIVE age have a lower risk of cardiovascular disease (CVD) than age-matched men (1). Sex differences in very low-density lipoprotein (VLDL)-triglyceride (TG) and VLDL-apolipoprotein B-100 (apoB-100) metabolism likely contribute to the lower CVD risk in women because VLDL particles and plasma TG concentrations are risk factors for CVD (2–4), and women have lower concentrations of VLDL and TG in plasma than men (5–8). Moreover, sex differences in total fasting plasma TG concentrations are entirely attributed to lower VLDL-TG concentration (9, 10).

VLDL are produced and secreted by the liver and are composed of TGs (~50–70%), cholesterol and cholesteryl esters (~20–40%), phospholipids (~5–10%), and the apolipoproteins B-100, C, and E. The synthesis, assembly, and secretion of VLDL-TG and VLDL-apoB-100 within hepatocytes are both independent and interactive processes. VLDL-

apoB-100 provides the structural framework of the VLDL particle and permits the incorporation of TGs, cholesterol and cholesteryl esters, and other apolipoproteins before VLDL secretion occurs (4, 11). Only one apoB-100 molecule is present in each VLDL particle (12), so VLDL-apoB-100 kinetic rates reflect the metabolic behavior of the VLDL particle. In contrast, the number of TG molecules present in VLDL can vary considerably (3, 11). The relationship between hepatic VLDL-TG and VLDL-apoB-100 secretion provides an index of the average TG content and therefore of the average size of VLDL particles secreted by the liver. Although changes in VLDL-TG and VLDL-apoB-100 secretion rates are similar in response to certain stimuli, *e.g.* free fatty acid (FFA) and insulin infusion (13, 14), there is also evidence that the secretion of VLDL-TG and VLDL-apoB-100 is independently regulated, *e.g.* in response to manipulation of dietary macronutrient composition, weight loss, and endurance exercise (15–18).

We recently found differences in VLDL-TG secretion and VLDL-TG plasma clearance rates between lean men and lean women (19). However, the effect of sex on the relationship between VLDL-TG and VLDL-apoB-100 fluxes during normal physiological conditions has not been investigated. Understanding the relationship between VLDL-TG and VLDL-apoB-100 metabolism has important physiological and clinical implications. TG removal from large, TG-rich VLDL particles via lipoprotein lipase (LPL) is more efficient than TG removal from small, TG-poor particles (20, 21). Further-

First Published Online January 30, 2007

Abbreviations: apoB-100, Apolipoprotein B-100; CVD, cardiovascular disease; FFA, free fatty acid; FFM, fat-free mass; FTR, fractional turnover rate; HDL, high-density lipoprotein; HOMA-IR, homeostasis model assessment insulin resistance; IDL, intermediate-density lipoprotein; LDL, low-density lipoprotein; LPL, lipoprotein lipase; MRT, mean residence time; Ra, rate of appearance; TG, triglyceride; TTR, tracer to tracee ratio; VLDL, very low-density lipoprotein.

JCEM is published monthly by The Endocrine Society (<http://www.endo-society.org>), the foremost professional society serving the endocrine community.

more, large VLDL and their lipolytic products have been associated with insulin resistance and atherosclerosis in humans (2–4). The purpose of the present study was to evaluate VLDL-TG and VLDL-apoB-100 kinetics, by using stable isotope-labeled tracers and mathematical modeling, in healthy, lean men and women.

## Subjects and Methods

### Subjects

Thirteen lean men and 13 lean women participated in the study (Table 1). Some but not all data presented here have previously been reported when basal FFA, VLDL-TG, and VLDL-apoB-100 kinetics were assessed for other purposes (16, 22). All subjects were considered to be in good health after completing a medical evaluation, which included a history and physical examination and standard blood tests. No subjects smoked cigarettes or were taking medications. We did not control for menstrual cycle phase in women because we have previously demonstrated that basal plasma FFA, VLDL-TG, and VLDL-apoB-100 kinetics are not different during the follicular and luteal phases of the menstrual cycle (22). Written informed consent was obtained from all subjects before their participation in the study, which was approved by the Human Studies Committee and the General Clinical Research Center Advisory Committee at Washington University School of Medicine (St. Louis, MO).

### Experimental protocol

Total body fat mass and fat-free mass (FFM) were assessed by dual-energy x-ray absorptiometry (Delphi-W densitometer; Hologic, Waltham, MA). Total abdominal, intraabdominal, and sc abdominal fat areas were determined by magnetic resonance imaging on a 1.5T scanner (Siemens, Iselin, NJ). Eight 10-mm-thick slice images were obtained beginning at the L<sub>4</sub>–L<sub>5</sub> interspace and analyzed for sc abdominal and intraabdominal fat cross-sectional areas with Analyze 6.0 software (Mayo Foundation, Biomedical Imaging Resource, Rochester, MN); the areas from serial images of the abdomen were averaged.

To determine whole-body FFA, VLDL-TG, and VLDL-apoB-100 kinetics, each subject completed a stable isotope-labeled tracer infusion study. Participants were instructed to adhere to their regular diet and to refrain from exercise for 3 d before the study. Subjects were admitted to the General Clinical Research Center the afternoon before the tracer infusion study. At 1930 h, they consumed a standard meal, containing 12 kcal/kg body weight (55% of total energy from carbohydrate, 30% from fat, and 15% from protein) and then fasted (except for water) and rested in bed until completion of the study the next day. At 0530 h the following morning, one catheter was inserted into a forearm vein to administer stable isotope-labeled tracers, and a second catheter was inserted into a vein in the contralateral hand, which was heated to 55°C with a thermostatically controlled box to obtain arterialized blood sam-

ples. Catheters were kept open by infusing 0.9% NaCl solution (30 ml/h). At 0700 h (time = 0), after blood samples for the determination of plasma substrate and hormone concentrations and background glycerol, palmitate and leucine tracer to tracee ratios (TTR) in plasma and VLDL-TG and apoB-100 were obtained, a bolus of [1,1,2,3,3-<sup>2</sup>H<sub>5</sub>]glycerol (75 μmol/kg), dissolved in 0.9% NaCl solution, was administered through the catheter in the forearm vein, and constant infusions of [2,2-<sup>2</sup>H<sub>2</sub>]palmitate (0.03 μmol/kg·min), dissolved in 25% human albumin solution, and [5,5,5-<sup>2</sup>H<sub>3</sub>]leucine (0.12 μmol/kg·min; priming dose: 7.2 μmol/kg), dissolved in 0.9% NaCl solution, were started and maintained for 12 h. Blood samples were collected at 5, 15, 30, 60, 90, and 120 min and then every hour for 10 h to determine glycerol and palmitate TTR in plasma and VLDL-TG, and leucine TTR in plasma and VLDL-apoB-100.

### Sample collection and analyses

To determine glucose concentration, blood was collected in tubes containing heparin; plasma was separated by centrifugation and analyzed immediately. All other blood samples were collected in chilled tubes containing sodium EDTA. Samples were placed on ice, and plasma was separated by centrifugation within 30 min of collection. Aliquots of plasma were kept in the refrigerator for immediate isolation of VLDL and measurement of plasma apoB-100 concentration. The remaining plasma samples were stored at –80°C until final analyses were performed.

The VLDL fraction was prepared as previously described (17). Briefly, approximately 1.5 ml of plasma were transferred into OptiSeal polyallomer tubes (Beckman Instruments, Palo Alto, CA), overlaid with a NaCl/EDTA solution (1.006 g/ml) and centrifuged at 100,000 × *g* for 16 h at 10°C in an Optima LE-80K preparative ultracentrifuge equipped with a type 50.4 Ti rotor (Beckman Instruments). The top layer, containing VLDL, was removed by tube slicing (CentriTube slicer; Beckman Instruments). Aliquots of the VLDL fraction were set aside for measuring VLDL-apoB-100 concentration immediately after collection; the remaining samples were stored at –80°C until final analyses were performed.

Plasma testosterone, progesterone, and 17β-estradiol concentrations were measured by using ELISA kits (IBL Immuno-Biological Laboratories GmbH, Hamburg, Germany). Plasma glucose concentration was determined on an automated glucose analyzer (YSI 2300 STAT plus; Yellow Spring Instrument Co., Yellow Springs, OH). Plasma insulin concentration was measured with RIA (Linco Research, St. Louis, MO). Plasma FFA concentrations were quantified by gas chromatography (HP 5890 series II GC; Hewlett-Packard, Palo Alto, CA) after adding heptadecanoic acid to plasma as an internal standard (23). Total plasma TG and VLDL-TG concentrations were determined with a colorimetric enzymatic kit (Sigma Chemicals, St. Louis, MO). Total plasma apoB-100 and VLDL-apoB-100 concentrations were measured with a turbidimetric immunoassay (Wako Pure Chemical Industries, Osaka, Japan).

Plasma free glycerol, palmitate, and leucine TTRs, the TTRs of glycerol and palmitate in VLDL-TG, and the TTR of leucine in VLDL-apoB-100 were determined by gas chromatography-mass spectrometry (Agilent Technologies/HP 6890 series GC System-5973 mass selective detector; Hewlett-Packard) (17, 23). The heptafluorobutyl derivative was formed for the analysis of glycerol in plasma and VLDL-TG, the tertiary-butyltrimethylsilyl derivative was prepared for plasma leucine, and the *N*-heptafluorobutyl *n*-propyl ester derivative was used for leucine in VLDL-apoB-100. Plasma free palmitate and palmitate in VLDL-TG were analyzed as methyl esters.

### Calculations

Palmitate rate of appearance (Ra) in plasma was calculated by dividing the palmitate tracer infusion rate by the average plasma palmitate TTR value between 60 and 240 min during physiologic and isotopic steady-state; total FFA Ra was derived by dividing palmitate Ra by the proportional contribution of palmitate to total plasma FFA concentration (24). The homeostasis model assessment insulin resistance (HOMA-IR) index was calculated to assess whole-body insulin resistance (25).

A metabolic steady-state existed with regard to VLDL-TG and VLDL-apoB-100 kinetics because plasma VLDL-TG and VLDL-apoB-100 concentrations remained constant throughout the 12-h sampling period.

**TABLE 1.** Anthropometric characteristics of study participants

|                                                       | Men        | Women      | <i>P</i> value |
|-------------------------------------------------------|------------|------------|----------------|
| n                                                     | 13         | 13         |                |
| Age (yr)                                              | 29 ± 5     | 28 ± 6     | 0.685          |
| Height (cm)                                           | 179 ± 5    | 167 ± 7    | <0.001         |
| Body mass index (kg/m <sup>2</sup> )                  | 22.0 ± 1.7 | 22.0 ± 1.5 | 0.983          |
| Body weight (kg)                                      | 71 ± 7     | 61 ± 8     | 0.003          |
| FFM (percent body weight)                             | 87 ± 5     | 73 ± 4     | <0.001         |
| Fat mass (percent body weight)                        | 13 ± 5     | 27 ± 4     | <0.001         |
| Abdominal fat area (cm <sup>2</sup> )                 | 123 ± 59   | 161 ± 58   | 0.119          |
| Intraabdominal fat (percent total abdominal fat area) | 37 ± 17    | 25 ± 10    | 0.036          |
| Subcutaneous fat (percent total abdominal fat area)   | 63 ± 17    | 75 ± 10    | 0.036          |

Values are means ± SD.

The fractional turnover rate (FTR) of VLDL-TG was determined by fitting the TTR time courses of free glycerol in plasma and glycerol in VLDL-TG to a compartmental model (26). The rate of VLDL-TG secretion (in micromoles per liter plasma per minute), which represents the amount of VLDL-TG secreted by the liver per unit of plasma, was calculated by multiplying the FTR of VLDL-TG (in pools per minute) by the concentration of VLDL-TG in plasma (in micromoles per liter). The plasma clearance rate of VLDL-TG (in milliliters plasma per minute), which is an index of the removal efficiency of VLDL-TG from plasma, was calculated by dividing the VLDL-TG secretion rate (in micromoles per minute) by the VLDL-TG concentration (in micromoles per milliliters). The mean residence time (MRT) of VLDL-TG (in minutes) was calculated as  $1/\text{FTR}$ . The VLDL-TG MRT indicates the average time that TG secreted in the core of VLDL remain in the VLDL fraction in the bloodstream. A short VLDL-TG MRT indicates a quick removal of TG from circulating VLDL particles, whereas a long MRT suggests that VLDL-TG, after being secreted by the liver, remains in plasma without being removed for a considerable amount of time. VLDL-TG plasma clearance and VLDL-TG MRT refer to loss of TG from the VLDL fraction via all possible routes, including LPL-mediated hydrolysis, transfer to other lipoproteins [e.g. high-density lipoproteins (HDLs)] via neutral lipid exchange, or conversion to higher-density particles [i.e. intermediate-density lipoproteins (IDLs) and low-density lipoproteins (LDLs)].

The relative contribution of systemic plasma FFAs and nonsystemic fatty acids to total VLDL-TG production was calculated by the principle of isotopic dilution upon fitting the palmitate TTR in plasma and VLDL-TG to the compartmental model used for the calculation of VLDL-TG FTR (26). By fitting the isotopic enrichments of plasma free palmitate and palmitate in VLDL-TG to this model, one can derive a dilution factor that indicates the extent to which the plasma palmitate enrichment was diluted by unlabeled sources of palmitate before being incorporated into VLDL-TG. These unlabeled, nonsystemic fatty acids in VLDL-TG are derived from pools of fatty acids that are not labeled with tracer during the infusion period; this includes: 1) fatty acids released from preexisting, slowly turning over lipid stores in the liver and tissues draining directly into the portal vein, 2) fatty acids resulting from lipolysis of plasma lipoproteins that are taken up by the liver, and 3) fatty acids derived from hepatic *de novo* lipogenesis (13). The remaining fatty acids in VLDL-TG (systemic plasma FFAs) represent FFAs from the systemic circulation that are taken up by the liver and directly incorporated into VLDL-TG or temporarily incorporated into rapidly turning over intrahepatic and ip TG stores before incorporation into VLDL-TG.

The FTR of VLDL-apoB-100 was calculated by fitting the TTR time courses of free leucine in plasma and leucine in VLDL-apoB-100 to a compartmental model (17). The rate of VLDL-apoB-100 secretion, the plasma clearance rate of VLDL-apoB-100, and the MRT of VLDL-apoB-100 (indices of the secretion rate, plasma clearance rate, and MRT of VLDL particles) were calculated based on plasma VLDL-apoB-100 concentration and VLDL-apoB-100 FTR as described above for VLDL-TG. VLDL-apoB-100 clearance, an index of the removal efficiency of VLDL particles, and VLDL-apoB-100 MRT, an index of the time VLDL particles

spend in the circulation, refer to the loss of the VLDL particle from the VLDL density range either through conversion to higher-density particles (i.e. IDL and LDL) or irreversible loss from plasma (e.g. direct uptake of the particle by tissues). A molecular mass of 512,723 g/mol for apoB-100 was used for unit conversions (27).

### Statistical analysis

All data sets were tested for normality according to Kolmogorov-Smirnov. Data are presented as means  $\pm$  SD for normally distributed variables; differences between men and women were examined by using multivariate ANOVA with Bonferroni's adjustment for multiple comparisons. Sex hormone concentrations were not normally distributed and are therefore presented as medians and quartiles; differences between men and women were examined by using the nonparametric Mann-Whitney *U* test. Associations between variables of interest (i.e. plasma FFA concentration and VLDL-TG and VLDL-apoB-100 secretion rates; molar ratio of VLDL-TG and VLDL-apoB-100 secretion rates and VLDL-TG MRT) were assessed with regression analyses.  $P \leq 0.05$  was considered statistically significant.

## Results

### Plasma substrate and hormone concentrations

Plasma insulin and glucose concentrations and whole-body insulin sensitivity (HOMA-IR index) were not different in men and women (Table 2). Plasma FFA concentration was approximately 45% greater in women than in men, but the difference did not reach statistical significance (Table 2). VLDL-TG and VLDL-apoB-100 concentrations were much less in women than in men (Table 2).

### FFA Ra

Total FFA Ra was not different in men and women ( $216 \pm 61$  and  $244 \pm 72$   $\mu\text{mol}/\text{min}$ , respectively,  $P = 0.285$ ). However, FFA Ra adjusted for differences in body size between women and men ( $4.1 \pm 1.4$  and  $3.0 \pm 0.8$   $\mu\text{mol}/\text{kg}$  body weight per minute, respectively;  $P = 0.032$ ) and FFA Ra in relation to FFM ( $5.5 \pm 1.7$  and  $3.5 \pm 1.0$   $\mu\text{mol}/\text{kg}$  FFM per minute, respectively;  $P = 0.002$ ) and FFA volume of distribution ( $101 \pm 31$  and  $64 \pm 19$   $\mu\text{mol}/\text{liter}$  plasma per minute, respectively;  $P = 0.002$ ) was 35–55% greater in women than men.

### VLDL-TG and VLDL-apoB-100 kinetics

Average TTR time courses for glycerol and palmitate in VLDL-TG and leucine in VLDL-apoB-100 in men and women

**TABLE 2.** Fasting plasma substrate and hormone concentrations

|                                                 | Men               | Women           | <i>P</i> value |
|-------------------------------------------------|-------------------|-----------------|----------------|
| Testosterone (nmol/liter) <sup>a</sup>          | 19.4 (17.3, 21.0) | 1.4 (1.0, 2.1)  | <0.001         |
| 17 $\beta$ -estradiol (pmol/liter) <sup>b</sup> | 60 (49, 82)       | 155 (69, 263)   | 0.023          |
| Progesterone (nmol/liter) <sup>c</sup>          | 0.8 (0.7, 1.1)    | 5.6 (0.9, 16.5) | 0.027          |
| Insulin (pmol/liter) <sup>d</sup>               | 30 $\pm$ 13       | 32 $\pm$ 19     | 0.813          |
| Glucose (mmol/liter)                            | 5.0 $\pm$ 0.3     | 4.9 $\pm$ 0.3   | 0.346          |
| HOMA-IR index                                   | 1.13 $\pm$ 0.56   | 1.15 $\pm$ 0.72 | 0.940          |
| FFAs ( $\mu\text{mol}/\text{liter}$ )           | 397 $\pm$ 154     | 574 $\pm$ 271   | 0.124          |
| Total TG (mmol/liter)                           | 0.73 $\pm$ 0.20   | 0.64 $\pm$ 0.15 | 0.180          |
| VLDL-TG (mmol/liter)                            | 0.38 $\pm$ 0.13   | 0.29 $\pm$ 0.09 | 0.036          |
| Total apoB-100 ( $\mu\text{mol}/\text{liter}$ ) | 1.25 $\pm$ 0.21   | 0.93 $\pm$ 0.25 | 0.002          |
| VLDL-apoB-100 (nmol/liter)                      | 55 $\pm$ 16       | 32 $\pm$ 11     | <0.001         |

Values are means  $\pm$  SD or medians (quartiles).

<sup>a</sup> Conversion factor from nanograms per milliliter to nanomoles per liter: 3.467.

<sup>b</sup> Conversion factor from from picograms per milliliter to picomoles per liter: 3.671.

<sup>c</sup> Conversion factor from nanograms per milliliter to nanomoles per liter: 3.18.

<sup>d</sup> Conversion factor from microunits per milliliter to picomoles per liter: 6.0.



and a representative model fit to the data from one subject are shown in Fig. 1.

The FTR of VLDL-TG was  $1.03 \pm 0.58$  pools per hour in women and  $0.44 \pm 0.11$  pools per hour in men ( $P = 0.001$ ); VLDL-apoB-100 FTR was  $0.49 \pm 0.16$  pools per hour in women and  $0.35 \pm 0.07$  pools per hour in men ( $P = 0.011$ ).

The secretion rate of VLDL-TG was approximately 70% greater in women than men ( $P = 0.023$ ; Fig. 2), whereas the secretion rate of VLDL-apoB-100 was approximately 20% less in women than in men ( $P = 0.030$ ; Fig. 2). Therefore, the molar ratio of VLDL-TG and VLDL-apoB-100 secretion rates, an index of the TG content of newly secreted VLDL particles, was more than double in women than men ( $P = 0.002$ ; Fig. 2).

The relative contribution of systemic plasma FFA and non-systemic fatty acid sources to total VLDL-TG production did not differ between sexes ( $P = 0.539$ ): systemic plasma FFA contributed  $78 \pm 15\%$  of fatty acids in VLDL-TG in men and  $75 \pm 7\%$  in women; nonsystemic fatty acids accounted for  $22 \pm 15$  and  $25 \pm 7\%$  of fatty acids in VLDL-TG in men and women, respectively. The absolute secretion rates of VLDL-TG derived from systemic plasma FFAs and nonsystemic fatty acids were therefore both significantly greater in women than in men ( $P = 0.040$  and  $P = 0.035$ , respectively; Fig. 2).

The plasma clearance rate of VLDL-TG was much greater

in women than men (by  $\sim 70\%$ ,  $P = 0.015$ ), whereas the plasma clearance rate of VLDL-apoB-100 was not different between sexes ( $P = 0.943$ ; Fig. 3). The MRT of VLDL-TG was approximately 45% shorter ( $P < 0.001$ ) and the MRT of VLDL-apoB-100 was approximately 25% shorter ( $P = 0.041$ ) in women than men (Fig. 3).

VLDL-TG and VLDL-apoB-100 secretion rates did not correlate with plasma FFA concentration, but the molar ratio of VLDL-TG and VLDL-apoB-100 secretion rates was negatively associated with VLDL-TG MRT ( $R^2 = 0.684$ ;  $P < 0.001$ , Fig. 4).

## Discussion

The regulation of hepatic VLDL secretion into plasma is of considerable clinical importance because derangements in VLDL metabolism are linked to CVD (2–4). The data from the present study indicate that there are considerable sex differences in VLDL metabolism. Increased VLDL-TG clearance from the circulation, which offsets increased hepatic VLDL-TG secretion in women, compared with men, is responsible for lower plasma VLDL-TG concentration in women, whereas decreased hepatic VLDL-apoB-100 secretion, combined with shorter VLDL-apoB-100 residence time in the circulation, is responsible for lower plasma VLDL-

VLDL-TG glycerol

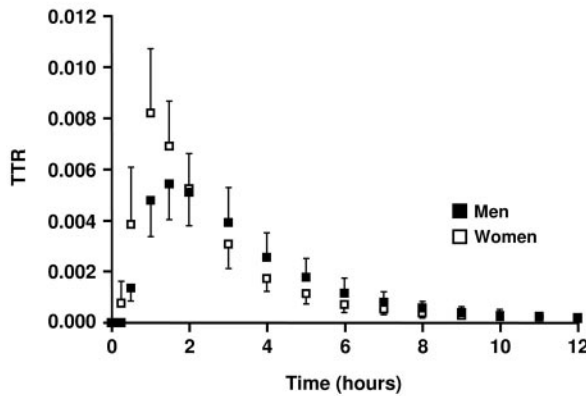

VLDL-apoB-100 leucine

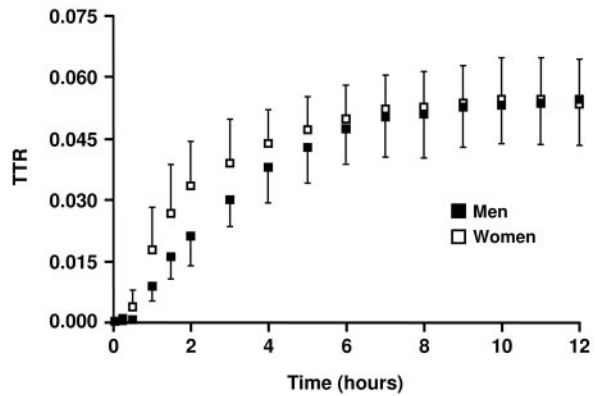

VLDL-TG palmitate

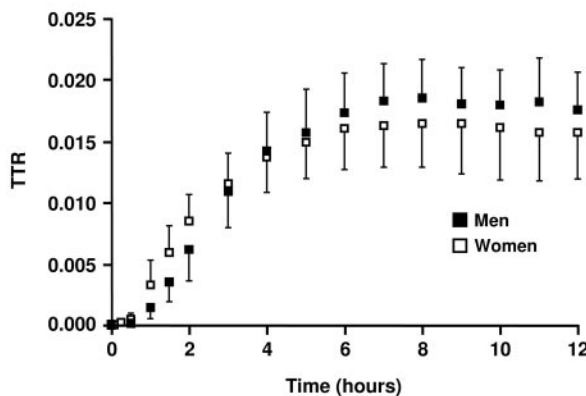

Model fit to data

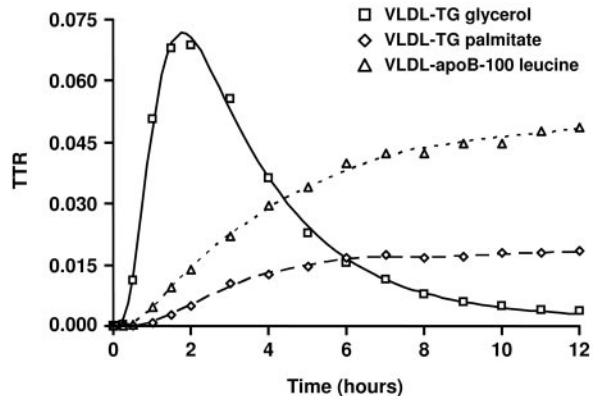

FIG. 1. Average (means  $\pm$  SD) TTR time courses for glycerol in VLDL-TG (top left panel), palmitate in VLDL-TG (bottom left panel), and leucine in VLDL-apoB-100 (top right panel) in men and women and a representative model fit to the TTR data from one subject for VLDL-TG glycerol (scaled  $\times 15$  for presentation), VLDL-TG palmitate, and VLDL-apoB-100 leucine (bottom right panel).

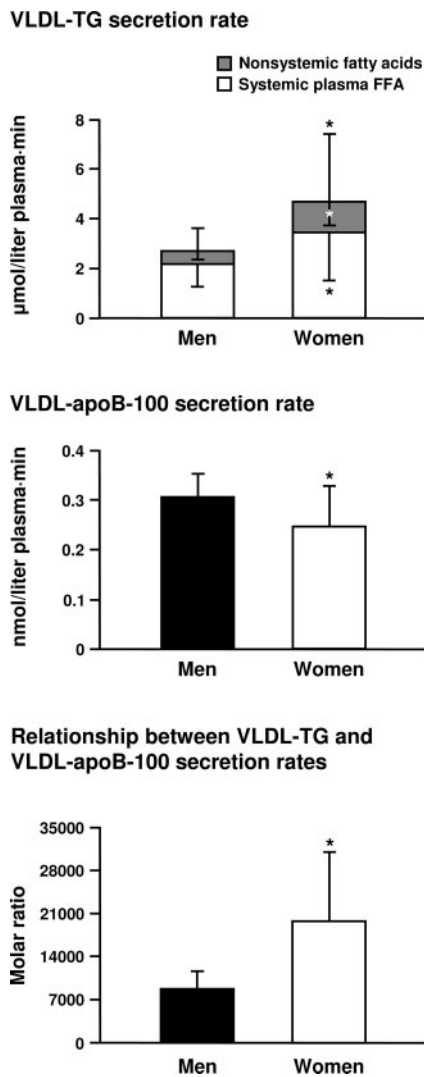

FIG. 2. VLDL-TG (top panel) and VLDL-apoB-100 (middle panel) secretion rates into plasma and molar ratio of VLDL-TG and VLDL-apoB-100 secretion rates (bottom panel), an index of the TG content of VLDL that are secreted by the liver, in men and women. Data are presented as means  $\pm$  SD. For VLDL-TG secretion, the contribution of systemic plasma FFA to fatty acids in VLDL-TG is represented by the white bars, and the contribution of nonsystemic fatty acids to fatty acids in VLDL-TG is represented by the gray bars. Error bars pointing upward represent SDs for total VLDL-TG secretion rate, and error bars pointing downward represent SDs for VLDL-TG derived from systemic plasma FFAs and nonsystemic fatty acids. \*, Value in women is significantly different from corresponding value in men;  $P < 0.05$ .

apoB-100 concentration in women than men. Moreover, a greater molar ratio of hepatic VLDL-TG and VLDL-apoB-100 secretion rates in lean women than lean men suggests that the liver in women secretes VLDL particles that contain more TGs, and are therefore larger, than VLDL secreted by the liver in men. This provides a potential mechanism responsible for increased VLDL-TG plasma clearance and consequently shorter VLDL-TG MRT and likely also VLDL-apoB-100 MRT in women because results from studies *in vitro* and *in vivo* in human subjects demonstrate faster removal of TGs from large, TG-rich VLDL particles than small, TG-poor particles (20, 21, 28).

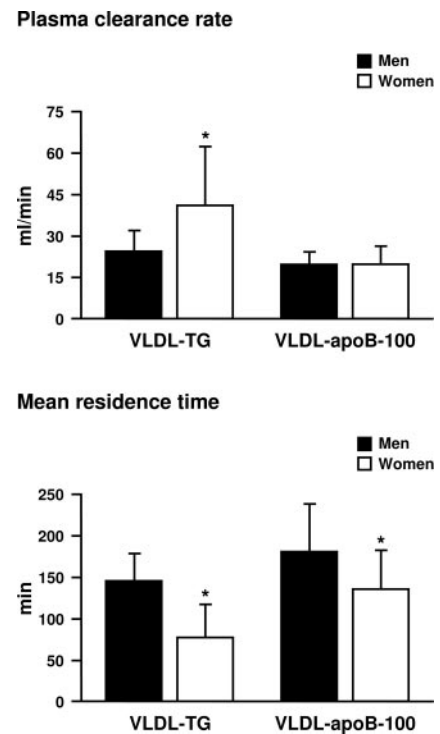

FIG. 3. VLDL-TG and VLDL-apoB-100 plasma clearance rates (top panel) and mean residence times (bottom panel) in men and women. Data are presented as means  $\pm$  SD. \*, Value in women is significantly different from corresponding value in men;  $P < 0.05$ .

Our findings indicate that the relationship between VLDL-TG and VLDL-apoB-100 secretion differs between healthy, lean men and women during basal conditions. A dissociation in hepatic VLDL-TG and VLDL-apoB-100 secretion rates has previously been demonstrated in response to physiological perturbations, such as dietary interventions (15, 17, 18) and endurance exercise (16). Therefore, different physiological mechanisms must be responsible for regulating VLDL-TG and VLDL-apoB-100 secretion. This metabolic flexibility provides a mechanism that allows the liver to safely handle an increased influx of fatty acids from the bloodstream or intrahepatic fatty acid sources by altering the TG content of secreted VLDL. Our study is the first demonstration that the molar ratio of VLDL-TG and VLDL-apoB-

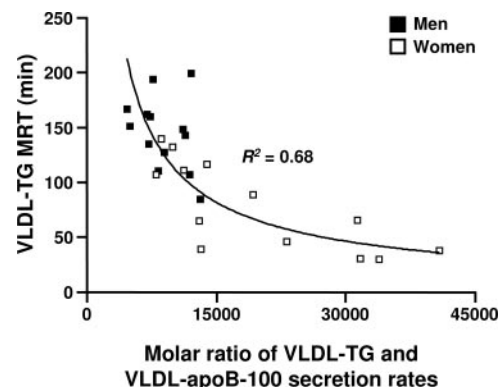

FIG. 4. Relationship between the molar ratio of VLDL-TG and VLDL-apoB-100 secretion rates and the MRT of VLDL-TG in the circulation.

100 secretion rates is greater in women than men. Although we did not assess the kinetics of VLDL subfractions (*e.g.* large, TG rich VLDL<sub>1</sub> and small, TG poor VLDL<sub>2</sub>), most of the additional TG secretion in women was probably due to increased TG content, rather than secretion of an increased number, of large, TG-rich VLDL<sub>1</sub> particles because the bulk (~90%) of VLDL-TG is secreted in large, TG-rich VLDL<sub>1</sub> (29, 30), and women in our study secreted overall fewer VLDL particles (large and small combined) than men. However, we cannot exclude secretion of fewer small, TG-poor VLDL<sub>2</sub> in women, compared with men. These findings are in agreement with the observed sex differences in the size of VLDL particles secreted by the liver from rodents *in vivo* (31) and *ex vivo* (32, 33).

Our kinetic data suggest that women secrete larger, TG-rich VLDL into the circulation than men. However, data from studies that measured plasma VLDL particle size indicate that on average VLDLs in women are smaller than VLDLs in men (6, 8). Nonetheless, these results are not necessarily inconsistent with each other. The size of circulating VLDL reflects the balance between the number and TG content of VLDL secreted into the circulation and the rate of TG removal from circulating VLDLs via LPL-mediated lipolysis, neutral lipid exchange with other lipoproteins (*e.g.* HDLs), conversion of VLDL to smaller, denser lipoprotein particles (*e.g.* IDLs and LDLs), and direct uptake of VLDLs by tissues. Based on our data, the smaller size of circulating VLDL in women than men (6, 8) is probably, at least in part, due to more efficient VLDL-TG removal from the circulation [(34, 35) and present study] because of the greater molar ratio of hepatic VLDL-TG and VLDL-apoB-100 secretion rates. *In vitro* studies have demonstrated that LPL-mediated lipolysis of TGs in large, TG-rich lipoproteins is more efficient than lipolysis of TGs in small, TG-poor particles (20, 21). The strong negative relationship between the molar ratio of VLDL-TG and VLDL-apoB-100 secretion rates and VLDL-TG MRT in our study is in good agreement with this hypothesis.

Sex differences in LPL activity may have further augmented the difference in VLDL-TG plasma clearance rate between our men and women because heparin-releasable LPL activity (an index of lipolytically active, endothelial-bound LPL) in adipose tissue (36–38) and skeletal muscle (39) was found to be greater in lean women than lean men. Some of the sex difference in VLDL-TG removal from plasma was probably also due to differences in the conversion of VLDL to IDLs and LDLs or direct uptake of VLDLs by tissues because VLDL-apoB-100 MRT was shorter in women than men. The fact that the difference in VLDL-TG MRT between men and women was much greater (~45%) than the difference in VLDL-apoB-100 MRT (~25%), however, indicates that this route of TG removal accounted for only a portion of the difference in total VLDL-TG removal. This is probably related to the original TG content of VLDLs at the time of secretion, which was more than double in women than men; hence, the particles remained in the VLDL density range despite faster loss of core TG. Furthermore, we cannot exclude differences in TG removal between men and women due to differences in the rate of neutral lipid exchange. However, it is conceivable that the shorter residence time of VLDL particles in the circulation in women than men may have

actually limited the exchange of TGs from VLDLs and cholesterol esters from HDL and thereby provide a potential mechanism responsible for higher plasma HDL cholesteryl concentration in women than men (5, 6, 8).

The mechanisms responsible for the differences in VLDL-TG and VLDL-apoB-100 kinetics between men and women are not clear. Hepatic FFA availability from plasma and circulating insulin are considered to be the major physiological regulators of hepatic VLDL-TG and VLDL-apoB-100 secretion (13, 40). Increasing plasma FFA concentration by infusing a lipid emulsion plus heparin stimulates, whereas insulin infusion suppresses both VLDL-TG and VLDL-apoB-100 production (14). In our subjects, FFA Ra adjusted for differences in body size, FFM, and FFA volume of distribution was significantly greater, and plasma FFA concentration tended to be greater in women than men. This could have stimulated VLDL-TG secretion but cannot explain the lower rate of VLDL-apoB-100 secretion in women. The fact that we did not measure fatty acid oxidation does not alter the interpretation of our results because the basal rate of fat oxidation, even when adjusted for body mass and/or FFM, is lower or not different in women, compared with men (41). In addition, women had less intraabdominal fat than men, whereas the secretion of VLDL-TG from non-systemic fatty acids, predominantly derived from intraabdominal fat depots, was much greater in women than men. Although our findings appear to contradict the commonly accepted notion that FFA availability is an important regulator of VLDL-TG and VLDL-apoB-100 secretion (13, 14, 42, 43), they are in agreement with several recent studies that reported no association between plasma FFA availability and VLDL-TG (16, 29, 44–47) or VLDL-apoB-100 (16, 48, 49) secretion rates. It is also unlikely that insulin contributed to the sex differences in VLDL-TG and VLDL-apoB-100 kinetics because plasma insulin concentration and whole-body insulin sensitivity, determined with the HOMA-IR index, were not different between our men and women. Although we cannot exclude sex differences in hepatic insulin sensitivity, it is unlikely that such differences would have affected the conclusions from our study because insulin suppresses both VLDL-TG and VLDL-apoB-100 secretion rates *in vivo* (14), but VLDL-TG secretion was greater, whereas VLDL-apoB-100 secretion was lower in our women than our men.

The absence of obvious differences in known systemic regulators of VLDL-TG and VLDL-apoB-100 secretion suggests that sex differences in hepatic VLDL-TG and VLDL-apoB-100 secretion may be directly related to differences in sex hormones between men and women. However, administration of estrogens or estrogens and progestogens stimulates both VLDL-TG (50, 51) and VLDL-apoB-100 (52–55) secretion rates, whereas only VLDL-TG but not VLDL-apoB-100 secretion rate was greater in our women than our men. Therefore, other gonadal hormones or cellular and metabolic adaptations to lifelong exposure to the sex-specific hormonal milieu are responsible for at least some of the differences in VLDL-TG and VLDL-apoB-100 metabolism between men and women. This notion is supported by data from studies involving isolated liver tissue: perfused livers from female rats produce more VLDL-TG than those from male rats (32, 33, 56, 57), and gene expression of hepatic enzymes involved



in intracellular lipid synthesis are up-regulated, whereas those involved in fatty acid oxidation are down-regulated in livers from female, compared with male rodents (58–60).

In summary, the data from this study elucidate the metabolic mechanisms responsible for the differences in VLDL-TG and VLDL-apoB-100 concentrations between healthy, lean men and women. Increased VLDL-TG clearance from the circulation, which offsets increased hepatic VLDL-TG secretion in women, compared with men, is responsible for lower plasma VLDL-TG concentration in women, whereas decreased hepatic VLDL-apoB-100 secretion, combined with shorter VLDL-apoB-100 residence time in the circulation, is responsible for lower plasma VLDL-apoB-100 concentration in women than men. In addition, differences in the relationship between hepatic VLDL-TG and VLDL-apoB-100 secretion rates indicate that the liver in women secretes TG-rich VLDL than the liver in men, which may in part be responsible for the greater VLDL-TG plasma clearance and shorter VLDL residence time in the circulation in women. Sex differences in hepatic secretion of VLDL-TG and VLDL-apoB-100 are not readily explained by FFA availability, insulin, or the direct action of the predominant sex hormones, suggesting there is sexual dimorphism in regulatory factors intrinsic to the liver.

### Acknowledgments

We thank Megan Steward for subject recruitment; Freida Custodio, Junyoung Kwon, and Adewole Okunade for technical assistance; and the study subjects for their participation.

Received October 10, 2006. Accepted January 22, 2007.

Address all correspondence and requests for reprints to: Bettina Mittendorfer, Ph.D., Washington University School of Medicine, Division of Geriatrics and Nutritional Science, 660 South Euclid Avenue, Campus Box 8031, St. Louis, Missouri 63110. E-mail: mittendb@wustl.edu.

This study was supported by the American Heart Association Grants 0365436Z and 0510015Z, a grant from the International Life Sciences Institute, and National Institutes of Health Grants AR 49869, DK 37948, DK 56341 (to Clinical Nutrition Research Unit), RR 00036 (to General Clinical Research Center), and RR 00954 (to Biomedical Mass Spectrometry Resource).

Disclosure Statement: The authors have nothing to disclose.

### References

- Kalin MF, Zumoff B 1990 Sex hormones and coronary disease: a review of the clinical studies. *Steroids* 55:330–352
- Carmena R, Duriez P, Fruchart JC 2004 Atherogenic lipoprotein particles in atherosclerosis. *Circulation* 109:III2–III7
- Packard CJ 1999 Understanding coronary heart disease as a consequence of defective regulation of apolipoprotein B metabolism. *Curr Opin Lipidol* 10: 237–244
- Olofsson SO, Boren J 2005 Apolipoprotein B: a clinically important apolipoprotein which assembles atherogenic lipoproteins and promotes the development of atherosclerosis. *J Intern Med* 258:395–410
- Contois JH, McNamara JR, Lammi-Keefe CJ, Wilson PW, Massov T, Schaefer EJ 1996 Reference intervals for plasma apolipoprotein B determined with a standardized commercial immunoturbidimetric assay: results from the Framingham Offspring Study. *Clin Chem* 42:515–523
- Freedman DS, Otvos JD, Jeyarajah EJ, Shalaurova I, Cupples LA, Parise H, D'Agostino RB, Wilson PW, Schaefer EJ 2004 Sex and age differences in lipoprotein subclasses measured by nuclear magnetic resonance spectroscopy: the Framingham Study. *Clin Chem* 50:1189–1200
- Jungner I, Marcovina SM, Walldius G, Holme I, Kolar W, Steiner E 1998 Apolipoprotein B and A-I values in 147576 Swedish males and females, standardized according to the World Health Organization-International Federation of Clinical Chemistry First International Reference Materials. *Clin Chem* 44:1641–1649
- Johnson JL, Slentz CA, Duscha BD, Samsa GP, McCartney JS, Houmard JA, Kraus WE 2004 Gender and racial differences in lipoprotein subclass distributions: the STRRIDE study. *Atherosclerosis* 176:371–377
- Carlson LA, Ericsson M 1975 Quantitative and qualitative serum lipoprotein analysis. Part 1. Studies in healthy men and women. *Atherosclerosis* 21:417–433
- Wahl PW, Warnick GR, Albers JJ, Hoover JJ, Walden CE, Bergelin RO, Ogilvie JT, Hazzard WR, Knopp RH 1981 Distribution of lipoproteins triglyceride and lipoprotein cholesterol in an adult population by age, sex, and hormone use. The Pacific Northwest Bell Telephone Company health survey. *Atherosclerosis* 39:111–124
- Gibbons GF, Wiggins D, Brown AM, Hebbachi AM 2004 Synthesis and function of hepatic very-low-density lipoprotein. *Biochem Soc Trans* 32:59–64
- Elovson J, Chatterton JE, Bell GT, Schumaker VN, Reuben MA, Puppione DL, Reeve Jr JR, Young NL 1988 Plasma very low density lipoproteins contain a single molecule of apolipoprotein B. *J Lipid Res* 29:1461–1473
- Lewis GF 1997 Fatty acid regulation of very low density lipoprotein production. *Curr Opin Lipidol* 8:146–153
- Lewis GF, Uffelman KD, Szeto LW, Weller B, Steiner G 1995 Interaction between free fatty acids and insulin in the acute control of very low density lipoprotein production in humans. *J Clin Invest* 95:158–166
- Melish J, Le NA, Ginsberg H, Steinberg D, Brown WV 1980 Dissociation of apoprotein B and triglyceride production in very-low-density lipoproteins. *Am J Physiol* 239:E354–E362
- Magkos F, Wright DC, Patterson BW, Mohammed BS, Mittendorfer B 2006 Lipid metabolism response to a single, prolonged bout of endurance exercise in healthy young men. *Am J Physiol Endocrinol Metab* 290:E355–E362
- Mittendorfer B, Patterson BW, Klein S 2003 Effect of weight loss on VLDL-triglyceride and apoB-100 kinetics in women with abdominal obesity. *Am J Physiol Endocrinol Metab* 284:E549–E556
- Klein S, Mittendorfer B, Eagon JC, Patterson B, Grant L, Feirt N, Seki E, Brenner D, Korenblat K, McCrea J 2006 Gastric bypass surgery improves metabolic and hepatic abnormalities associated with nonalcoholic fatty liver disease. *Gastroenterology* 130:1564–1572
- Mittendorfer B, Patterson BW, Klein S 2003 Effect of sex and obesity on basal VLDL-triacylglycerol kinetics. *Am J Clin Nutr* 77:573–579
- Fisher RM, Coppack SW, Humphreys SM, Gibbons GF, Frayn KN 1995 Human triacylglycerol-rich lipoprotein subfractions as substrates for lipoprotein lipase. *Clin Chim Acta* 236:7–17
- Breckenridge WC 1985 The catabolism of very low density lipoproteins. *Can J Biochem Cell Biol* 63:890–897
- Magkos F, Patterson BW, Mittendorfer B 2006 No effect of menstrual cycle phase on basal very-low-density lipoprotein triglyceride and apolipoprotein B-100 kinetics. *Am J Physiol Endocrinol Metab* 291:E1243–E1249
- Patterson BW, Zhao G, Elias N, Hachey DL, Klein S 1999 Validation of a new procedure to determine plasma fatty acid concentration and isotopic enrichment. *J Lipid Res* 40:2118–2124
- Mittendorfer B, Liem O, Patterson BW, Miles JM, Klein S 2003 What does the measurement of whole-body fatty acid rate of appearance in plasma by using a fatty acid tracer really mean? *Diabetes* 52:1641–1648
- Matthews DR, Hosker JP, Rudenski AS, Naylor BA, Treacher DF, Turner RC 1985 Homeostasis model assessment: insulin resistance and  $\beta$ -cell function from fasting plasma glucose and insulin concentrations in man. *Diabetologia* 28:412–419
- Patterson BW, Mittendorfer B, Elias N, Satyanarayana R, Klein S 2002 Use of stable isotopically labeled tracers to measure very low density lipoprotein-triglyceride turnover. *J Lipid Res* 43:223–233
- Law SW, Grant SM, Higuchi K, Hospattankar A, Lackner K, Lee N, Brewer Jr HB 1986 Human liver apolipoprotein B-100 cDNA: complete nucleic acid and derived amino acid sequence. *Proc Natl Acad Sci USA* 83:8142–8146
- Streja D, Kallai MA, Steiner G 1977 The metabolic heterogeneity of human very low density lipoprotein triglyceride. *Metabolism* 26:1333–1344
- Adiels M, Boren J, Caslake MJ, Stewart P, Soro A, Westerbacka J, Wennberg B, Olofsson SO, Packard C, Taskinen MR 2005 Overproduction of VLDL<sub>1</sub> driven by hyperglycemia is a dominant feature of diabetic dyslipidemia. *Arterioscler Thromb Vasc Biol* 25:1697–1703
- Adiels M, Packard C, Caslake MJ, Stewart P, Soro A, Westerbacka J, Wennberg B, Olofsson SO, Taskinen MR, Boren J 2005 A new combined multicompartmental model for apolipoprotein B-100 and triglyceride metabolism in VLDL subfractions. *J Lipid Res* 46:58–67
- Soler-Argilaga C, Danon A, Wilcox HG, Heimberg M 1976 Effects of sex on formation and properties of plasma very low density lipoprotein *in vivo*. *Lipids* 11:517–525
- Soler-Argilaga C, Wilcox HG, Heimberg M 1976 The effect of sex on the quantity and properties of the very low density lipoprotein secreted by the liver *in vitro*. *J Lipid Res* 17:139–145
- Wilcox HG, Woodside WF, Breen KJ, Knapp Jr HR, Heimberg M 1974 The effect of sex on certain properties of the very low density lipoprotein secreted by the liver. *Biochem Biophys Res Commun* 58:919–926
- Nikkila EA, Kekki M 1971 Polymorphism of plasma triglyceride kinetics in normal human adult subjects. *Acta Med Scand* 190:49–59
- Olefsky J, Farquhar JW, Reaven GM 1974 Sex difference in the kinetics of

- triglyceride metabolism in normal and hypertriglyceridaemic human subjects. *Eur J Clin Invest* 4:121–127
36. Pedersen SB, Jonler M, Richelsen B 1994 Characterization of regional and gender differences in glucocorticoid receptors and lipoprotein lipase activity in human adipose tissue. *J Clin Endocrinol Metab* 78:1354–1359
  37. Taskinen MR, Kuusi T 1986 High density lipoproteins in postprandial lipemia. Relation to sex and lipoprotein lipase activity. *Atherosclerosis* 59:121–130
  38. Nikkila EA, Taskinen MR, Kekki M 1978 Relation of plasma high-density lipoprotein cholesterol to lipoprotein-lipase activity in adipose tissue and skeletal muscle of man. *Atherosclerosis* 29:497–501
  39. Simoneau JA, Veerkamp JH, Turcotte LP, Kelley DE 1999 Markers of capacity to utilize fatty acids in human skeletal muscle: relation to insulin resistance and obesity and effects of weight loss. *FASEB J* 13:2051–2060
  40. Gibbons GF, Brown AM, Wiggins D, Pease R 2002 The roles of insulin and fatty acids in the regulation of hepatic very-low-density lipoprotein assembly. *J R Soc Med* 95(Suppl 42):23–32
  41. Blaak E 2001 Gender differences in fat metabolism. *Curr Opin Clin Nutr Metab Care* 4:499–502
  42. Lewis GF, Uffelman KD, Szeto LW, Steiner G 1993 Effects of acute hyperinsulinemia on VLDL triglyceride and VLDL apoB production in normal weight and obese individuals. *Diabetes* 42:833–842
  43. Malmstrom R, Packard CJ, Watson TD, Rannikko S, Caslake M, Bedford D, Stewart P, Yki-Jarvinen H, Shepherd J, Taskinen MR 1997 Metabolic basis of hypotriglyceridemic effects of insulin in normal men. *Arterioscler Thromb Vasc Biol* 17:1454–1464
  44. Carpentier A, Patterson BW, Leung N, Lewis GF 2002 Sensitivity to acute insulin-mediated suppression of plasma free fatty acids is not a determinant of fasting VLDL triglyceride secretion in healthy humans. *Diabetes* 51:1867–1875
  45. Kissebah AH, Harrigan P, Wynn V 1973 Mechanism of hypertriglyceridaemia associated with contraceptive steroids. *Horm Metab Res* 5:184–190
  46. Gormsen LC, Jensen MD, Schmitz O, Moller N, Christiansen JS, Nielsen S 2006 Energy expenditure, insulin, and VLDL-triglyceride production in humans. *J Lipid Res* 47:2325–2332
  47. Vogelberg KH, Gries FA, Moschinski D 1980 Hepatic production of VLDL-triglycerides. Dependence of portal substrate and insulin concentration. *Horm Metab Res* 12:688–694
  48. Malmstrom R, Packard CJ, Caslake M, Bedford D, Stewart P, Yki-Jarvinen H, Shepherd J, Taskinen MR 1998 Effects of insulin and acipimox on VLDL1 and VLDL2 apolipoprotein B production in normal subjects. *Diabetes* 47:779–787
  49. Malmstrom R, Packard CJ, Caslake M, Bedford D, Stewart P, Shepherd J, Taskinen MR 1999 Effect of heparin-stimulated plasma lipolytic activity on VLDL Apo B subclass metabolism in normal subjects. *Atherosclerosis* 146:381–390
  50. Glueck CJ, Fallat RW, Scheel D 1975 Effects of estrogenic compounds on triglyceride kinetics. *Metabolism* 24:537–545
  51. Tikkanen MJ, Kuusi T, Nikkila EA, Sane T 1985 Very low density lipoprotein triglyceride kinetics during hepatic lipase suppression by estrogen. Studies on the physiological role of hepatic endothelial lipase. *FEBS Lett* 181:160–164
  52. Schaefer EJ, Foster DM, Zech LA, Lindgren FT, Brewer Jr HB, Levy RI 1983 The effects of estrogen administration on plasma lipoprotein metabolism in premenopausal females. *J Clin Endocrinol Metab* 57:262–267
  53. Walsh BW, Sacks FM 1993 Effects of low dose oral contraceptives on very low density and low density lipoprotein metabolism. *J Clin Invest* 91:2126–2132
  54. Walsh BW, Schiff I, Rosner B, Greenberg L, Ravnarik V, Sacks FM 1991 Effects of postmenopausal estrogen replacement on the concentrations and metabolism of plasma lipoproteins. *N Engl J Med* 325:1196–1204
  55. Campos H, Walsh BW, Judge H, Sacks FM 1997 Effect of estrogen on very low density lipoprotein and low density lipoprotein subclass metabolism in postmenopausal women. *J Clin Endocrinol Metab* 82:3955–3963
  56. Soler-Argilaga C, Heimberg M 1976 Comparison of metabolism of free fatty acid by isolated perfused livers from male and female rats. *J Lipid Res* 17:605–615
  57. Watkins ML, Fizette N, Heimberg M 1972 Sexual influences on hepatic secretion of triglyceride. *Biochim Biophys Acta* 280:82–85
  58. Ameen C, Oscarsson J 2003 Sex difference in hepatic microsomal triglyceride transfer protein expression is determined by the growth hormone secretory pattern in the rat. *Endocrinology* 144:3914–3921
  59. Ameen C, Linden D, Larsson BM, Mode A, Holmang A, Oscarsson J 2004 Effects of gender and GH secretory pattern on sterol regulatory element-binding protein-1c and its target genes in rat liver. *Am J Physiol Endocrinol Metab* 287:E1039–E1048
  60. Stahlberg N, Rico-Bautista E, Fisher RM, Wu X, Cheung L, Flores-Morales A, Tybring G, Norstedt G, Tollet-Egnell P 2004 Female-predominant expression of fatty acid translocase/CD36 in rat and human liver. *Endocrinology* 145:1972–1979

JCEM is published monthly by The Endocrine Society (<http://www.endo-society.org>), the foremost professional society serving the endocrine community.
